# Supplementary material for: The impact of lignin source on its self-assembly in solution
Source: Royal Society of Chemistry journal article supplement (doi:10.1039/c5ra13485d), 2015-01-01
Supplement: c5ra13485d1.pdf [file c5ra13485d1.pdf]

## **Supplemental Information**

### **The Impact of Lignin Source on its Self-Assembly in Solution**

Dilru R. Ratnaweera<sup>1</sup>, Dipendu Saha<sup>2</sup>, Sai Venkatesh Pingali<sup>3</sup>, Nicole Labbé<sup>5</sup>, Amit K. Naskar<sup>2</sup>, Mark Dadmun<sup>1,4</sup>

<sup>1</sup>Department of Chemistry, University of Tennessee, Knoxville, TN 37996, USA

<sup>2</sup>Material Science & Technology Division, <sup>3</sup>Biology and Soft Matter Division and <sup>4</sup>Chemical Sciences Division, Oak Ridge National Laboratory, Oak Ridge, TN 37831, USA

<sup>5</sup>Center for Renewable Carbon, The University of Tennessee Institute of Agriculture, Knoxville, TN 37996

#### **Advantages and limitations of neutron scattering:**

Neutron scattering is a very powerful tool to determine the structure and dynamics of polymers, primarily because of the ability to tune the contrast between components by selectively deuterating the polymer, portions of polymers, or the surrounding media. Additionally, neutrons can readily penetrate matter because the neutrons interact with the nucleus of an atom. This means that the sample holder of a neutron scattering experiment can be quite large and complex. It is therefore common to complete neutron-scattering experiments in a broad range of sample environments

However, there are some drawbacks to using neutron scattering. These include the fact that completion of the experiment usually requires travel to a national facility, and the flux of neutrons available is much lower than in similar light or X-ray experiments. This limitation on the flux of neutrons requires significant sample size (usually, ~0.1–1.0 g), with larger sizes needed for unusual sample environments, such as a shear cell. This may be a particular problem for biological and exotic samples, where it is difficult to create more than a few milligrams of a given material.

Even given these limitations, neutron scattering is a unique and very powerful technique distinctively characterizes the microscopic structure and dynamics of polymers, colloids, and other soft materials. For instance, no other method provides a direct measure of the size of a polymer chain in the melt. Similarly, the structure and thermodynamic

interactions of polymers in concentrated solutions and blends are most effectively monitored by carefully designed neutron-scattering experiments.

## Pyrolysis Gas Chromatography Mass Spectrometry (PyGC/MS)

This technique has been used to assess lignocellulosic biomass and their isolated components. S/G and impurity (carbohydrates) levels can be calculated from the pyrograms. Figure 1 show representative pyrogram for the three lignins and Table 1 summarizes the major fragments that are usually found in biomass and lignin.

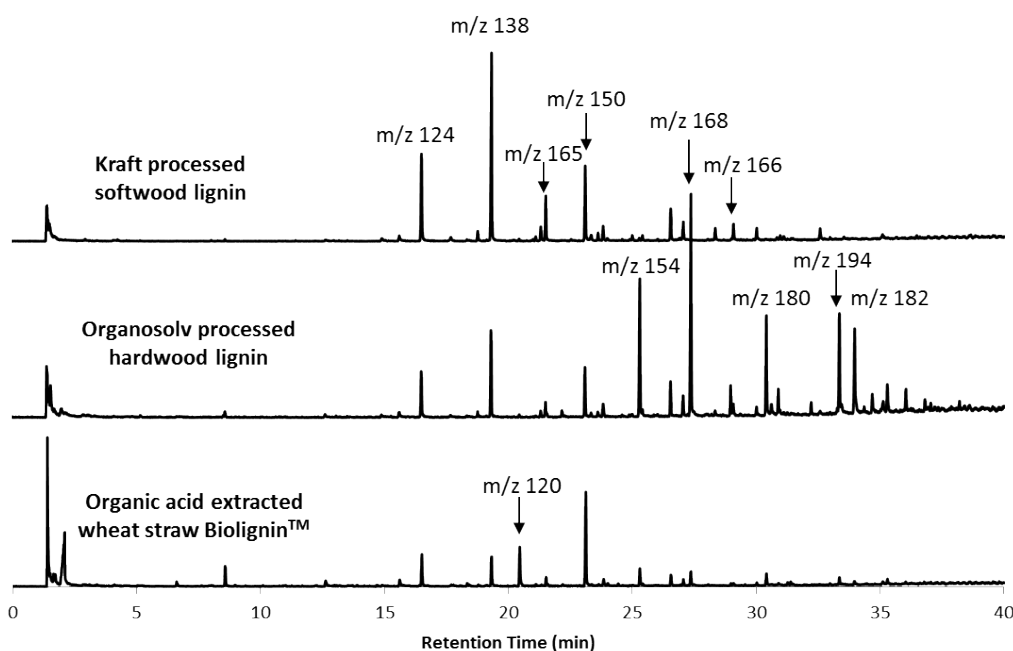

Table 1: Mass spectrum peak assignments associated with PyGC/MS lignin samples.

Abbreviation:  $m/z$  = mass:charge ratio of fragments extracted, major lignin peaks

assignments: syringyl (S), guaiacyl (G), *p*-hydroxyphenyl (H) (adapted from References 1 and 2.)

| <i>m/z</i>               | <i>Assignment</i>                                                       | <i>S,G,H<br/>precursor</i> |
|--------------------------|-------------------------------------------------------------------------|----------------------------|
| 57, 73, 85, 96, 114      | C5 sugars                                                               |                            |
| 57, 60, 73, 98, 126, 144 | C6 sugars                                                               |                            |
| 94                       | Phenol                                                                  | H, S, G                    |
| 109                      | Guaiacol                                                                | G                          |
| 120                      | Vinylphenol                                                             | H, S, G                    |
| 123                      | 4-Methyl guaiacol                                                       | G                          |
| 124                      | Guaiacol                                                                | G                          |
| 137                      | Fragment ions of ethylguaiacol, homovanillin,<br>coniferyl alcohol      | G                          |
| 138                      | 4-Methyl guaiacol                                                       | G                          |
| 150                      | 4-Vinylguaiacol                                                         | G                          |
| 151                      | Fragment ion of vanillin and 4-ethylguaiacol                            | G                          |
| 152                      | Vanillin , 4-ethylguaiacol                                              | G                          |
| 153                      | 2,6-Dimethoxy-4-methylvinylphenol                                       | S                          |
| 154                      | Syringol                                                                | S                          |
| 164                      | Eugenol, (iso)eugenol,                                                  | G                          |
| 165                      | Sinapaldehyde, 2,6-dimethoxy-4-vinylphenol                              | S                          |
| 167                      | Fragment ions of 4-ethylsyringol, syringylacetone, 4-<br>propylsyringol | S                          |
| 168                      | 2,6-dimethoxy-4-methylvinylphenol                                       | S                          |
| 178                      | Coniferyl aldehyde                                                      | G                          |
| 180                      | 2,6-dimethoxy-4-vinylphenol, coniferyl alcohol                          | S, G                       |
| 182                      | Syringaldehyde                                                          | S                          |
| 194                      | 4-Propenylsyringol                                                      | S                          |
| 208                      | Sinapyl aldehyde                                                        | S                          |
| 210                      | Sinapyl alcohol                                                         | S                          |

- 1 Sykes, R.; Kodrzycki, B.; Tuskan, G.; Foutz, K.; Davis, M. Within tree variability of lignin composition in *Populus*. *Wood Sci Technol.* **2008**, 42, 649-661.
- 2 Izumi, A.; Kurada, K. Pyrolysis-mass spectrometry analysis of dehydrogenation lignin polymers with various syringyl/guaiacyl ratios. *Rapid Communication in Mass Spectrometry* 11: 1709-1715, 1997.
